# Supplementary material for: Germline CNV Detection through Whole-Exome Sequencing (WES) Data Analysis Enhances Resolution of Rare Genetic Diseases
Source: MDPI journal article supplement (doi:10.3390/genes14071490), 2023-07-21
Supplement: s1 [file s1]

**Table S2.** Characteristics of all the CNVs identified by ExomeDepth in 454 samples.

|                                      | <b>Deletions</b>         | <b>Duplications</b>      |
|--------------------------------------|--------------------------|--------------------------|
| <b>Number of CNVs</b>                | 69912                    | 36547                    |
| <b>Size</b>                          | 170b (1 exon) to 13.7 Mb | 320b (1 exon) to ..... * |
| <b>Number of CNVs per individual</b> | 70 – 188                 | 59 – 124                 |

\*Including two cases of Aneuploidy (Trisomy 21 and Klinefelter). b: base pair, Mb: Megabase pair
