# Supplementary material for: Germline CNV Detection through Whole-Exome Sequencing (WES) Data Analysis Enhances Resolution of Rare Genetic Diseases
Source: MDPI journal article supplement (doi:10.3390/genes14071490), 2023-07-21
Supplement: s1 [file s1]

**Table S1.** Concordance of CNVs detected between ExomeDepth and confirmation methods.

| Patient | Type | CNV predicted coordinates (Grch37/hg19) | CNV size | Zygosity   | GENES                                                           | CNV Confirmation Method                                                                                          | Additional Information                                                                                                            | Similarity to confirmation methods |
|---------|------|-----------------------------------------|----------|------------|-----------------------------------------------------------------|------------------------------------------------------------------------------------------------------------------|-----------------------------------------------------------------------------------------------------------------------------------|------------------------------------|
| 3       | DEL  | chr12:11463270_14019142                 | 2.6 Mb   | 0.67 (HTZ) | <i>GRIN2B</i> + 19 genes                                        | MLPA: MRC P410-A2 - <i>GRIN2B</i> Deletion                                                                       | MRC P410-A2 MLPA kit                                                                                                              | 100%*                              |
| 6       | DUP  | chr15:23684691_28566579                 | 4.9 Mb   | 1.21       | <i>GOLGA6L2</i> ,<br><i>MKRN3</i> ,<br><i>MAGEL2</i> + 11 genes | MS-MLPA: MRC ME028-D1 + STRs                                                                                     | MRC ME028-D1 MS-MLPA kit                                                                                                          | n/a                                |
|         |      |                                         |          |            |                                                                 |                                                                                                                  | STR - <i>GABRB3</i> Primers: 5' FAM-CTCTTGTTCTGTTGCTTTCAATACAC-3' (forward) and 5'-CACTGTGCTAGTAGATTGAGCTC-3' (reverse)           |                                    |
| 8       | DEL  | chr16:8841965_8851663                   | 9.7 Kb   | 0.51 (HTZ) | <i>ABAT</i>                                                     | Targeted RNA Sequencing: deletion exons 4-6 and Sanger seq for SNV. In trans: Deletion Maternal and SNV Paternal | Targeted RNA Sequencing - <i>ABAT</i> exons 2-8 Primers: 5'-ATGGCCTCCATGTTGCT-3' (forward) and 5'-CCGGTACCACATGAAGAT-3' (reverse) | n/a                                |
|         |      |                                         |          |            |                                                                 |                                                                                                                  | Sanger seq for SNV - <i>ABAT</i> exon 14 Primers: 5'-GCCCACTAGATTAGTTTCTCTCC-3' (forward) and 5'-CCGTTACGAACTGCTGGAA-3' (reverse) |                                    |
| 9       | DUP  | chrX:19564040_19954016                  | 390 Kb   | 1.64       | <i>SH3KBP1</i>                                                  | aCGH: arr[GRCh37] Xp22.12(19591222_19935900)x2                                                                   | 4x180K G3 CGH+SNP microarray platform (G4890A, Agilent Technologies)                                                              | 88.5%                              |

|    |     |                          |          |            |                                                                    |                                                                                                                                                          |                                                                                                                                                                                                                                                                                                                                                                                                                                                                   |       |
|----|-----|--------------------------|----------|------------|--------------------------------------------------------------------|----------------------------------------------------------------------------------------------------------------------------------------------------------|-------------------------------------------------------------------------------------------------------------------------------------------------------------------------------------------------------------------------------------------------------------------------------------------------------------------------------------------------------------------------------------------------------------------------------------------------------------------|-------|
| 10 | DUP | chr17:44949883_46507482  | 1.6 Mb   | 1.4        | <i>PNPO</i><br>(Whole gene)<br>+ 34 genes                          | STRs (Duplication Paternal) + Sanger (SNV Maternal)                                                                                                      | <p>STRs - In duplicated region: a) 16xCA Primers: 5' FAM-CACTCAGCCTATACATGCTTCT-3' (forward) and 5'-TCTTAAGTTTAGCAACTCCCTTCA-3' (reverse), b) 19xAC 5' FAM-ATCGCATGACTGCACTTC-3' (forward) and 5'-GACCTTGAGGATTGGCTTT-3' (reverse), c) 21xAC 5' FAM-GTCCTGTCAACGTGATAGATAAA-3' and 5'-CTAAGGAGCTTGGAATTCATT-3' (reverse)</p> <p>Sanger seq for SNV - <i>PNPO</i> exon 7 Primers: 5'-GCAACTTCCTTCAAGAGG-3' (forward) and 5'-AGGGAAATGGGTTGAGTTTAG-3' (reverse)</p> | n/a   |
| 12 | DEL | chr7:72717395_74173168   | 1.5 Mb   | 0.53 (HTZ) | <i>ELN, LIMK1 + 23 genes</i>                                       | MLPA: MRC P245-A2 MLPA Analysis. Deletions on <i>ELN</i> and <i>LIMK1</i> index genes confirmed the presence of the large deletion on chromosome 7q11.23 | MRC P245-A2 MLPA kit                                                                                                                                                                                                                                                                                                                                                                                                                                              | n/a   |
| 13 | DEL | chrX:153295818_153298008 | 2.2 Kb   | 0.69 (HTZ) | <i>MECP2</i>                                                       | MLPA: MRC P015-F2 - <i>MECP2</i> Deletion, Exons 2-3                                                                                                     | MRC P015-F2 MLPA kit                                                                                                                                                                                                                                                                                                                                                                                                                                              | 100%* |
| 15 | DUP | chr1:146465878_147416212 | 950.3 Kb | 1.28       | <i>NBPF14, PRKAB2, FMO5, CHD1L, BCL9, ACP6, GJA5, GJA8, GPR89B</i> | aCGH: arr[GRCh37] 1q21.1q21.2(146507518_147824207)x3                                                                                                     | 4x180K G3 CGH+SNP microarray platform (G4890A, Agilent Technologies)                                                                                                                                                                                                                                                                                                                                                                                              | 73%   |
| 16 | DEL | chr2:166872248_167334216 | 462 Kb   | 0.48 (HTZ) | <i>SCN1A, SCN9A, SCN7A</i>                                         | MLPA: MRC P137-C1 - <i>SCN1A</i> Deletion, Exons 1-16                                                                                                    | MRC P137-C1 MLPA kit                                                                                                                                                                                                                                                                                                                                                                                                                                              | 100%* |

|    |     |                          |          |            |                                                                                                       |                                                                     |                                                                                                                                                |       |
|----|-----|--------------------------|----------|------------|-------------------------------------------------------------------------------------------------------|---------------------------------------------------------------------|------------------------------------------------------------------------------------------------------------------------------------------------|-------|
| 17 | DEL | chr8:94713453_97978274   | 8.8 Mb   | 0.69 (HTZ) | <i>MMP16</i> ,<br><i>NBN</i> , <i>DECR1</i><br>+ 35 genes                                             | aCGH: arr[GRCh37]<br>8q21.3q22.1(89148404_98017865)x1               | 4x180K G3 CGH+SNP microarray<br>platform (G4890A, Agilent<br>Technologies)                                                                     | 98.8% |
| 22 | DEL | chrX:31950355_32305635   | 355.3 Kb | 0 (HEM)    | <i>DMD</i>                                                                                            | MLPA: MRC P034-B2 and P035-B1 - <i>DMD</i><br>Deletion, Exons 44-45 | MRC P034-B2 + P035-B1 MLPA kit                                                                                                                 | 100%* |
| 24 | DEL | chrX:149761077_149818374 | 57.3Kb   | 0 (HEM)    | <i>MTM1</i>                                                                                           | MLPA: MRC P309 - <i>MTM1</i> Deletion, Exons<br>2-10                | MRC P309 MLPA kit                                                                                                                              | 100%* |
| 25 | DEL | chr7:2606751_2641098     | 34.3 Kb  | 0.7 (HTZ)  | <i>IQCE</i>                                                                                           | STRs (Deletion Maternal) + Sanger seq for<br>SNV (SNV Paternal)     | STR - <i>IQCE</i> Intron 8 19xGT Primers: 5'<br>FAM -<br>AAGTAGATGGTGAAAGCCTAGC-3'<br>(forward) and 5'-<br>TGAGCTGAATGCTGCAGTG-3'<br>(reverse) | n/a   |
|    |     |                          |          |            |                                                                                                       |                                                                     | Sanger seq for SNV - <i>IQCE</i> exon 12<br>Primers: 5'-<br>ATTCACCTGTCCCTCGTTTC-3'<br>(forward) and 5'-<br>TTGCCAAGGGTTCACATC-3'<br>(reverse) |       |
| 26 | DEL | chr6:491126_1624775      | 1,1 Mb   | 0.62 (HTZ) | <i>FOXC1</i> ,<br><i>FOXF2</i> ,<br><i>FOXQ1</i> ,<br><i>GMDS</i> ,<br><i>EXOC2</i> ,<br><i>HUS1B</i> | aCGH: arr[GRCh37]<br>6p25.3(510688_1671743)x1                       | 4x180K G3 CGH+SNP microarray<br>platform (G4890A, Agilent<br>Technologies)                                                                     | 91.6% |
| 27 | DEL | chr17:34842545_36293050  | 1,5 Mb   | 0.65 (HTZ) | <i>HNF1B</i><br>(Whole gene)<br>+ 14 genes                                                            | MLPA: MRC P463-A2 - <i>HNF1B</i> Deletion                           | MRC P463-A2 MLPA kit                                                                                                                           | 100%* |

|    |      |                          |          |            |                                                                                                                                                                                   |                                                                                                    |                                                                                                                                                                                        |       |
|----|------|--------------------------|----------|------------|-----------------------------------------------------------------------------------------------------------------------------------------------------------------------------------|----------------------------------------------------------------------------------------------------|----------------------------------------------------------------------------------------------------------------------------------------------------------------------------------------|-------|
| 29 | DEL  | chr5:133956623_133959709 | 3.1 Kb   | 0.32 (HTZ) | SAR1B                                                                                                                                                                             | STRs (Deletion Maternal) + Sanger seq for SNV (SNV Paternal)                                       | STR - SAR1B Intron 2 10xATTT<br>Primers: 5' HEX-<br>GGCATTGTAGATATGTTAAGGCAAA-<br>3' (forward) and 5'-<br>GAGGTAAGGAGTTTGACACCAG-3'<br>(reverse)                                       | n/a   |
|    |      |                          |          |            |                                                                                                                                                                                   |                                                                                                    | Sanger seq for SNV - SAR1B exon 7<br>Primers: 5'-<br>AGGAGGCTTCTTGTGTGTTTC-3'<br>(forward) and 5'-<br>GCATGTTGAGCAATCAAATCTCT-3'<br>(reverse)                                          |       |
| 30 | DEL  | chr9:97401423_97401592   | 170 b    | 0.52 (HTZ) | FBP1                                                                                                                                                                              | GAP-PCR: <i>FBP1</i><br>Deletion:chr9:97396231_97401641<br>(5410bp), identical with PMID: 27101822 | GAP-PCR <i>FBP1</i> Primers (deletion<br>5410bp, including exon 1 and part of<br>intron 1): 5'-<br>TAAAGGTTTCCGCGATTAC-3'<br>(forward) and 5'-<br>GCTAGGACCAGCGATTTCAG-3'<br>(reverse) | n/a   |
| 31 | DELE | chr18:55020078_56892966  | 1.9 Mb   | 0.52 (HTZ) | <i>ATP8B1,</i><br><i>ST8SIA3,</i><br><i>ONECUT2,</i><br><i>FECH,</i><br><i>NARS1,</i><br><i>NEDD4L,</i><br><i>ALPK2,</i><br><i>MALT1,</i><br><i>ZNF532,</i><br><i>SEC11C, GRP</i> | aCGH: arr[GRCh37]<br>18q21.31q21.32(54919098_56963819)x1                                           | 4x180K G3 CGH+SNP microarray<br>platform (G4890A, Agilent<br>Technologies)                                                                                                             | 93.1% |
| 32 | DEL  | chr1:216138660_216270555 | 131,9 Kb | 0.66 (HTZ) | USH2A                                                                                                                                                                             | MLPA: MRC P362-A3 MLPA Analysis -<br><i>USH2A</i> Deletion, Exons 22, 24, 26, 28, 30,<br>32, 34    | MRC P362-A3 MLPA kit                                                                                                                                                                   | 100%* |
| 35 | DUP  | chrX:200855_155240074    | 155 Mb   | 1.8        | Additional X<br>chromosome                                                                                                                                                        | Conventional Karyotype                                                                             | n/a                                                                                                                                                                                    | 100%  |

|    |     |                          |        |                  |                                                                     |                                                              |                                                                            |       |
|----|-----|--------------------------|--------|------------------|---------------------------------------------------------------------|--------------------------------------------------------------|----------------------------------------------------------------------------|-------|
| 37 | DEL | chrX:105066840_106486528 | 1.4 Mb | 0.00873<br>(HEM) | <i>PIH1D3</i> ,<br><i>TBC1D8B</i> ,<br><i>SERPINA7</i> + 9<br>genes | aCGH: arr[GRCh37] Xq22.3(105088238_<br>106606637)x0          | 4x180K G3 CGH+SNP microarray<br>platform (G4890A, Agilent<br>Technologies) | 93.3% |
| 38 | DEL | chr22:22893189_24177119  | 1.3 Mb | 0.67<br>(HTZ)    | <i>SMARCB1</i><br>(Whole gene)<br>+ 16 genes                        | MLPA: MRC P258-C2 MLPA Analysis -<br><i>SMARCB1</i> Deletion | MRC P258-C2 MLPA kit                                                       | 100%* |

\* These percentages (%) are referred only to the exons of the phenotype-relevant gene analyzed by MLPA, NOT to the entire CNV coordinates detected by ExomeDepth.

DEL: Deletion, DUP: Duplication, b: base pair, Kb: Kilobase pair, Mb: Megabase pair, HTZ: Heterozygous, HEM: Hemizygous, aCGH: array-comparative genomic hybridization, MLPA: Multiple Ligation Probe Amplification, GAP-PCR: GAP-Polymerase Chain Reaction, STR: Short Tandem Repeats, SNV: Single Nucleotide Variant, SNP: Single Nucleotide Polymorphism, n/a: not applicable.
