# Supplementary material for: Germline CNV Detection through Whole-Exome Sequencing (WES) Data Analysis Enhances Resolution of Rare Genetic Diseases
Source: MDPI journal article supplement (doi:10.3390/genes14071490), 2023-07-21
Supplement: s1 [file s1]

**Table S3.** List of patients with CNVs detected by ExomeDepth from WES data.

| Patient                             | Main Clinical Features      | Type | CNV predicted coordinates (Grch37/hg19) | CNV size | Bayes Factor | Reads Ratio | Genes (Transcript)          | Number of coding Genes/Exons (Exon No) | CNV Classification (ACMG Score)                     | CNV Confirmation method                    | Inheritance (Additional Comments) | SNV combined with the CNV | Disease (MIM number)                                                                                   |
|-------------------------------------|-----------------------------|------|-----------------------------------------|----------|--------------|-------------|-----------------------------|----------------------------------------|-----------------------------------------------------|--------------------------------------------|-----------------------------------|---------------------------|--------------------------------------------------------------------------------------------------------|
| <b>Neurodevelopmental Disorders</b> |                             |      |                                         |          |              |             |                             |                                        |                                                     |                                            |                                   |                           |                                                                                                        |
| 1                                   | GDD, Hypertonia, Seizures   | DEL  | chr3:9482141_9490314                    | 8,2 Kb   | 19,1         | 0.72 (HTZ)  | <i>SETD5</i> (NM_001080517) | 9 Exons (8-16)                         | LIKELY PATHOGENIC: 0.9 (1A, 2B, 2E, 3A)             | n/a                                        | AD                                | n/a                       | Intellectual developmental disorder, autosomal dominant 23 (615761)                                    |
| 2                                   | GDD, Dysmorphic features    | DEL  | chr5:127800418_134002686                | 6.2 Mb   | 1080         | 0.66 (HTZ)  | <i>PPP2CA</i> + 46 genes    | 47 Genes                               | PATHOGENIC: 1 (1A, 2A, 2B, 2C, 2H, 3C, 4L)          | n/a                                        | AD                                | n/a                       | Neurodevelopmental disorder and language delay with or without structural brain abnormalities (618354) |
| 3                                   | Hypotonia Failure to thrive | DEL  | chr12:11463270_14019142                 | 2.6 Mb   | 477          | 0.67 (HTZ)  | <i>GRIN2B</i> + 19 genes    | 20 Genes                               | PATHOGENIC: 1 (1A, 2A, 3A, 4L)                      | MLPA: MRC P410-A2 - <i>GRIN2B</i> Deletion | AD, <i>de novo</i>                | n/a                       | Intellectual developmental disorder, autosomal dominant 6, with or without seizures (613970)           |
| 4                                   | GDD, Hypotonia              | DUP  | chr2:149220152_149633312                | 413.2 Kb | 51           | 1.25        | <i>MBD5</i> (NM_001378120)  | 9 Exons (6-14)                         | LIKELY PATHOGENIC: 0.9 (1A, 2B, 2K, 2L, 3A, 4L, 5H) | n/a                                        | AD                                | n/a                       | Intellectual developmental disorder, autosomal dominant 1 (156200)                                     |
| 5                                   | Macrocephaly, GDD           | DEL  | chr17:27834915_27870040                 | 35.1 Kb  | 32,2         | 0.6 (HTZ)   | <i>TAOK1</i> (NM_020791)    | 7 Exons (14-20)                        | LIKELY PATHOGENIC: 0.9 (1A, 2B, 2E, 3A)             | n/a                                        | AD                                | n/a                       | Developmental delay with or without intellectual impairment or behavioral abnormalities (619575)       |

|    |                                              |     |                          |          |      |            |                                                                    |                                                                                       |                                            |                                                                                                                  |                                         |                                         |                                                                           |
|----|----------------------------------------------|-----|--------------------------|----------|------|------------|--------------------------------------------------------------------|---------------------------------------------------------------------------------------|--------------------------------------------|------------------------------------------------------------------------------------------------------------------|-----------------------------------------|-----------------------------------------|---------------------------------------------------------------------------|
| 6  | GDD                                          | DUP | chr15:23684691_28566579  | 4.9 Mb   | 401  | 1.21       | <i>MAGEL2, SNRPN, UBE3A, ATP10A, GABRB3, HERC2</i> + 8 genes       | 14 Genes                                                                              | PATHOGENIC: 1 (1A, 2A, 2B, 2H, 3A, 4L)     | MS-MLPA: MRC ME028-D1 + STRs                                                                                     | AD (Triplosensitivity), Maternal        | n/a                                     | 15q11-q13 maternal duplication syndrome (608636)                          |
| 7  | Seizures, GDD                                | DEL | chr16:29495011_30206548  | 711.5 Kb | 479  | 0.7 (HTZ)  | <i>PRRT2, QPRT</i> + 29 genes                                      | 31 Genes                                                                              | PATHOGENIC: 1 (1A, 2A, 2H, 3B, 4L, 4O)     | n/a                                                                                                              | AD                                      | n/a                                     | Convulsions, familial infantile, with paroxysmal choreoathetosis (602066) |
| 8  | Epileptic Encephalopathy, Hypotonia          | DEL | chr16:8841965_8851663    | 9.7 Kb   | 14,7 | 0.51 (HTZ) | <i>ABAT</i> (NM_020686)                                            | 3 Exons (4-6)                                                                         | LIKELY PATHOGENIC: 0.9 (1A, 2B, 2E, 3A)    | Targeted RNA Sequencing: deletion exons 4-6 and Sanger seq for SNV. In trans: Deletion Maternal and SNV Paternal | AR, Compound HTZ with Pathogenic SNV    | <i>ABAT</i> : c.1153G>T, p.(Asp385Ty r) | GABA-transaminase deficiency (613163)                                     |
| 12 | GDD, Hypotonia Seizures                      | DEL | chr7:72717395_74173168   | 1.5 Mb   | 2270 | 0.53 (HTZ) | <i>ELN, LIMK1</i> + 23 genes                                       | 25 Genes                                                                              | PATHOGENIC: 1 (1A, 2A, 2H, 3A, 4L)         | MLPA: MRC P245-A2 ( <i>ELN</i> and <i>LIMK1</i> index genes deletion)                                            | AD (Haploinsufficiency), <i>de novo</i> | n/a                                     | Williams-Beuren syndrome (194050)                                         |
| 13 | GDD                                          | DEL | chrX:153295818_153298008 | 2.2 Kb   | 11,8 | 0.69 (HTZ) | <i>MECP2</i> (NM_001110792)                                        | 2 Exons (2-3)                                                                         | PATHOGENIC: 1 (1A, 2B, 2E, 3A, 4L)         | MLPA: MRC P015-F2 - <i>MECP2</i> Deletion, Exons 2-3                                                             | XL, <i>de novo</i>                      | n/a                                     | Rett syndrome (312750)                                                    |
| 15 | Autism, GDD, Aortic aneurysm, Hypothyroidism | DUP | chr1:146465878_147416212 | 950.3 Kb | 263  | 1.28       | <i>NBPF14, PRKAB2, FMO5, CHD1L, BCL9, ACP6, GJA5, GJA8, GPR89B</i> | 9 Genes                                                                               | PATHOGENIC: 1 (1A, 2A, 2H, 3A, 4L, 4N, 4O) | aCGH: arr[GRCh37] 1q21.1q21.2(146507518_147824207)x3                                                             | AD (Triplosensitivity)                  | n/a                                     | Chromosome 1q21.1 duplication syndrome (612475)                           |
| 16 | Epileptic Encephalopathy, Seizures           | DEL | chr2:166872248_167334216 | 462 Kb   | 116  | 0.48 (HTZ) | <i>SCN1A</i> (NM_006920), <i>SCN9A, SCN7A</i>                      | <i>SCN1A</i> 16 exons (1-16), <i>SCN9A</i> (whole gene), <i>SCN7A</i> 24 exons (3-26) | PATHOGENIC: 1 (1A, 2A, 2B, 2C, 3A, 4L)     | MLPA: MRC P137-C1 - <i>SCN1A</i> Deletion, Exons 1-16                                                            | AD                                      | n/a                                     | Dravet syndrome (607208)                                                  |

|                                |                                                                  |     |                         |          |      |            |                                                     |                 |                                                 |                                                                  |                                      |                                       |                                                                                                 |
|--------------------------------|------------------------------------------------------------------|-----|-------------------------|----------|------|------------|-----------------------------------------------------|-----------------|-------------------------------------------------|------------------------------------------------------------------|--------------------------------------|---------------------------------------|-------------------------------------------------------------------------------------------------|
| 17                             | GDD, Delayed ability to walk, Myopathy Contractures              | DEL | chr8:89179899_97978274  | 8.8 Mb   | 638  | 0.69 (HTZ) | <i>MMP16, NBN, DECR1</i> + 35 genes                 | 38 genes        | PATHOGENIC: 1 (1A, 2A, 2B, 2D, 2H, 3A, 4L)      | aCGH: arr[GRCh37] 8q21.3q22.1(89148404_98017865)x1               | AD (Haploinsufficiency)              | n/a                                   | n/a                                                                                             |
| 18                             | GDD, Autism, Aortic aneurysm                                     | DEL | chr15:22833525_23412276 | 578.8 Kb | 465  | 0.51 (HTZ) | <i>TUBGCP5, CYFIP1, NIPA2, NIPA1</i>                | 4 genes         | PATHOGENIC: 1 (1A, 2A, 2H, 3A, 4L, 4N, 4O)      | n/a                                                              | AD (Haploinsufficiency)              | n/a                                   | Chromosome 15q11.2 deletion syndrome (615656)                                                   |
| 19                             | Failure to thrive, Hypotonia GDD                                 | DUP | chr17:16664739_20370783 | 3.7 Mb   | 1470 | 1.38       | <i>RAI1, ATPAF2, B9D1, SREBF1, TOP3A</i> + 48 genes | 53 genes        | PATHOGENIC: 1 (1A, 2A, 2E, 2G, 2H, 3C, 4L)      | n/a                                                              | AD (Triplosensitivity)               | n/a                                   | Potocki-Lupski syndrome/Chromosome 17p11.2 duplication syndrome (610883)                        |
| <b>Neuromuscular Disorders</b> |                                                                  |     |                         |          |      |            |                                                     |                 |                                                 |                                                                  |                                      |                                       |                                                                                                 |
| 20                             | Lower limb muscle weakness, Gait abnormalities                   | DEL | chr9:36227245_36227455  | 211 b    | 15,2 | 0.5 (HTZ)  | <i>GNE</i> (NM_005476)                              | 1 Exon (7)      | LIKELY PATHOGENIC: 0.9 (1A, 2B, 2E, 3A)         | n/a                                                              | AR, Compound HTZ with Pathogenic SNV | <i>GNE</i> : c.1985C>T, p.(Ala662Val) | Nonaka myopathy (605820)                                                                        |
| 21                             | Muscle weakness, Myasthenic syndrome                             | DEL | chr11:47459526_47460482 | 957 b    | 16,7 | 0.51 (HTZ) | <i>RAPSN</i> (NM_005055)                            | 2 Exons (7-8)   | LIKELY PATHOGENIC: 0.9 (1A, 2B, 2E, 3A, 4E, 5H) | n/a                                                              | AR, Compound HTZ with Pathogenic SNV | <i>RAPSN</i> : c.264C>A, p.(Asn88Lys) | Myasthenic syndrome, congenital, 11, associated with acetylcholine receptor deficiency (616326) |
| 22                             | Elevated circulating creatine kinase concentration, Sex reversal | DEL | chrX:31950355_32305635  | 355.3 Kb | 87   | 0 (HEM)    | <i>DMD</i> (NM_004006)                              | 2 Exons (44-45) | LIKELY PATHOGENIC: 0.9 (1A, 2B, 2E, 3A, 4L)     | MLPA: MRC P034-B2 and P035-B1 - <i>DMD</i> Deletion, Exons 44-45 | XL                                   | n/a                                   | Becker muscular dystrophy (300376)                                                              |

|                            |                                                     |     |                          |          |      |             |                                                        |                                                             |                                                         |                                                                |                                                   |                                        |                                                          |
|----------------------------|-----------------------------------------------------|-----|--------------------------|----------|------|-------------|--------------------------------------------------------|-------------------------------------------------------------|---------------------------------------------------------|----------------------------------------------------------------|---------------------------------------------------|----------------------------------------|----------------------------------------------------------|
| 23                         | Difficulty walking, Gait disturbance, Ptosis        | DEL | chr19:38987608_38993136  | 5.5 Kb   | 22   | 0.54 (HTZ)  | <i>RYR1</i> (NM_000540)                                | 5 Exons (43-47)                                             | LIKELY PATHOGENIC: 0.9 (1A, 2B, 2E, 3A, 4E, 5H)         | n/a                                                            | AR, Compound HTZ with Pathogenic SNV              | <i>RYR1</i> : c.1250T>C, p.(Leu417Pro) | Minicore myopathy with external ophthalmoplegia (255320) |
| 24                         | Generalized neonatal hypotonia<br>Neonatal asphyxia | DEL | chrX:149761077_149818374 | 57.3 Kb  | 78,9 | 0 (HEM)     | <i>MTM1</i> (NM_000252)                                | 9 Exons (2-10)                                              | PATHOGENIC: 1 (1A, 2C, 2E, 3A)                          | MLPA: MRC P309 Analysis - <i>MTM1</i> Deletion, Exons 2-10     | XL                                                | n/a                                    | Myopathy, centronuclear, X-linked (310400)               |
| <b>Renal Disorders</b>     |                                                     |     |                          |          |      |             |                                                        |                                                             |                                                         |                                                                |                                                   |                                        |                                                          |
| 26                         | Stickler syndrome /Renal disorder                   | DEL | chr6:491126_1624775      | 1,1 Mb   | 32   | 0.62 (HTZ)  | <i>FOXC1, FOXF2, FOXQ1, GMD5, EXOC2, HUS1B</i>         | 6 Genes                                                     | PATHOGENIC: 1 (1A, 2A, 2B, 2C, 2H, 3A, 4L)              | aCGH: arr[GRCh37] 6p25.3(510688_1671743)x1                     | AD                                                | n/a                                    | Axenfeld-Rieger syndrome, type 3 (602482)                |
| <b>Metabolic Disorders</b> |                                                     |     |                          |          |      |             |                                                        |                                                             |                                                         |                                                                |                                                   |                                        |                                                          |
| 27                         | Hypertransaminasemia, Weight loss                   | DEL | chr17:34842545_36293050  | 1,5 Mb   | 507  | 0.65 (HTZ)  | <i>HNF1B</i> + 14 genes                                | 15 Genes                                                    | PATHOGENIC: 1.0 (1A, 2A, 2H, 3A, 4L, 4O)                | MLPA: MRC P463-A2- <i>HNF1B</i> Deletion                       | AD, <i>de novo</i>                                | n/a                                    | Renal cysts and diabetes syndrome (137920)               |
| 28                         | Neonatal Jaundice                                   | DEL | chr12:21007963_21392123  | 384.2 Kb | 392  | 0.005 (HOM) | <i>SLCO1B3</i> (NM_019844), <i>SLCO1B1</i> (NM_006446) | <i>SLCO1B3</i> 15 Exons (2-16), <i>SLCO1B1</i> (Whole Gene) | LIKELY PATHOGENIC: 0.9 (1A, 2A, 2B, 2D, 3A, 4L, 4N, 4O) | n/a                                                            | AR                                                | n/a                                    | Hyperbilirubinemia, Rotor type, digenic (237450)         |
| 29                         | Abnormal circulating apolipoprotein concentration   | DEL | chr5:133956623_133959709 | 3.1 Kb   | 15,5 | 0.32 (HTZ)  | <i>SAR1B</i> (NM_016103)                               | 2 Exons (2-3)                                               | LIKELY PATHOGENIC: 0.9 (1A, 2B, 2E, 3A)                 | STRs (Deletion Maternal) + Sanger seq for SNV (SNV Paternal)   | AR, Compound HTZ with Pathogenic SNV              | <i>SAR1B</i> : c.554G>T, p.(Gly185Val) | Chylomicron retention disease (246700)                   |
| 30                         | Hypoglycemia                                        | DEL | chr9:97401423_97401592   | 170 b    | 24,9 | 0.52 (HTZ)  | <i>FBP1</i> (NM_000507)                                | 1 Exon (1)                                                  | PATHOGENIC: 1 (1A, 2B, 2E, 3A, 4L)                      | GAP-PCR: <i>FBP1</i> Deletion: chr9:97396231_97401641 (5410bp) | AR, Compound HTZ with Pathogenic SNV (seemed HOM) | <i>FBP1</i> : c.170+4A>G               | Fructose-1,6-bisphosphatase deficiency (229700)          |

|                                                 |                                                                                        |     |                           |          |      |            |                                                                                  |                  |                                    |                                                                      |                                      |                                    |                                                                                                                 |
|-------------------------------------------------|----------------------------------------------------------------------------------------|-----|---------------------------|----------|------|------------|----------------------------------------------------------------------------------|------------------|------------------------------------|----------------------------------------------------------------------|--------------------------------------|------------------------------------|-----------------------------------------------------------------------------------------------------------------|
| 31                                              | Posterior Embryotoxon, Jaundice, Hyperbilirubinemia, Intrahepatic Cholestasis          | DEL | chr18:55020078_56892966   | 1.9 Mb   | 814  | 0.52 (HTZ) | ATP8B1, ST8SIA3, ONECUT2, FECH, NARS1, NEDD4L, ALPK2, MALT1, ZNF532, SEC11C, GRP | 11 Genes         | PATHOGENIC: 1 (1A, 2A, 2H, 3A, 4L) | aCGH: arr[GRCh37] 18q21.31q21.32(54919098_56963819)x1                | AD/AR                                | n/a                                | Cholestasis, intrahepatic, of pregnancy, 1 (147480) / Cholestasis, progressive familial intrahepatic 1 (211600) |
| <b>Ocular/Auditory Disorders</b>                |                                                                                        |     |                           |          |      |            |                                                                                  |                  |                                    |                                                                      |                                      |                                    |                                                                                                                 |
| 32                                              | Retinitis Pigmentosa                                                                   | DEL | chr1:216138660_216270555  | 131,9 Kb | 53   | 0.66 (HTZ) | USH2A (NM_206933)                                                                | 16 Exons (22-37) | PATHOGENIC: 1 (1A, 2B, 2E, 3A, 4L) | MLPA: MRC P362-A3 - USH2A Deletion, Exons 22, 24, 26, 28, 30, 32, 34 | AR, Compound HTZ with Pathogenic SNV | USH2A: c.10712C>T, p.(Thr3571 Met) | Usher syndrome, type 2A (276901)                                                                                |
| 33                                              | Choanal atresia, Microcephaly, Hearing impairment                                      | DEL | chr17:42929777_42937911   | 8.1 Kb   | 67,7 | 0.56 (HTZ) | EFTUD2 (NM_004247)                                                               | 10 Exons (17-26) | PATHOGENIC: 1 (1A, 2B, 2E, 3A, 4E) | n/a                                                                  | AD                                   | n/a                                | Mandibulofacial dysostosis, Guion-Almeida type (610536)                                                         |
| <b>Congenital anomalies/Syndromic Disorders</b> |                                                                                        |     |                           |          |      |            |                                                                                  |                  |                                    |                                                                      |                                      |                                    |                                                                                                                 |
| 34                                              | Trigonocephaly, Hypotonia, GDD, Thin corpus callosum, Hypertelorism, Carp-shaped mouth | DEL | chr11:120531028_134257553 | 13.7 Mb  | 4120 | 0.53 (HTZ) | HEPACAM, PUS3, ROBO4, FLI1 + 101 genes                                           | 105 Genes        | PATHOGENIC: 1 (1A, 2A, 2H, 3C, 4L) | n/a                                                                  | AD (Haploinsufficiency)              | n/a                                | Jacobsen syndrome (147791)                                                                                      |

|                                 |                            |     |                          |         |      |               |                                            |                 |                                             |                                                 |                                                   |                                    |                                                                |
|---------------------------------|----------------------------|-----|--------------------------|---------|------|---------------|--------------------------------------------|-----------------|---------------------------------------------|-------------------------------------------------|---------------------------------------------------|------------------------------------|----------------------------------------------------------------|
| 35                              | Tall stature, Marfan like  | DUP | chrX:200855_155240074    | 155 Mb  | 5497 | 1.8           | Additional X chromosome                    | 834 Genes       | PATHOGENIC: 1 (1A, 2A, 2G, 2H, 3C, 4L)      | Conventional Karyotype                          | Additional X chromosome (Aneuploidy)              | n/a                                | Klinefelter syndrome - 47,XXY                                  |
| <b>Dermatological Disorders</b> |                            |     |                          |         |      |               |                                            |                 |                                             |                                                 |                                                   |                                    |                                                                |
| 36                              | Ichthyosis                 | DEL | chrX:6968337_8434424     | 1.5 Mb  | 238  | 0.53 (HTZ)    | <i>STS, PNPLA4, PUDP, VCX, VCX2, VCX3B</i> | 6 Genes         | PATHOGENIC: 1 (1A, 2A, 3A, 4E, 4L, 4N, 4O)  | n/a                                             | XL                                                | n/a                                | Ichthyosis, X-linked (308100)                                  |
| <b>Others Disorders</b>         |                            |     |                          |         |      |               |                                            |                 |                                             |                                                 |                                                   |                                    |                                                                |
| 37                              | Primary ciliary dyskinesia | DEL | chrX:105066840_106486528 | 1.4 Mb  | 542  | 0.00873 (HEM) | <i>PIH1D3, TBC1D8B, SERPINA7</i> +9 genes  | 12 Genes        | LIKELY PATHOGENIC: 0.9 (1A, 2A, 2H, 3A, 4E) | aCGH: arr[GRCh37] Xq22.3(105088238_106606637)x0 | XL                                                | n/a                                | Ciliary dyskinesia, primary, 36, X-linked (300991)             |
| 38                              | Rhabdoid tumors            | DEL | chr22:22893189_24177119  | 1.3 Mb  | 257  | 0.67 (HTZ)    | <i>SMARCB1</i> + 16 genes                  | 17 Genes        | PATHOGENIC: 1 (1A, 2A, 2G, 2H, 3A, 4L, 4N)  | MLPA: MRC P258-C2 - <i>SMARCB1</i> Deletion     | AD, <i>de novo</i>                                | n/a                                | Schwannomatosis 22q11.22-q11.23 (162091)                       |
| 39                              | Severe Neutropenia         | DEL | chr1:154247426_154248177 | 752 b   | 82,9 | 0 (HOM)       | <i>HAX1</i> (NM_006118)                    | 4 Exons (4-7)   | LIKELY PATHOGENIC: 0.9 (1A, 2B, 2E, 3A)     | n/a                                             | AR                                                | n/a                                | Neutropenia, severe congenital 3, autosomal recessive (610738) |
| 40                              | Fanconi anemia             | DEL | chr16:89818649_89883044  | 64.4 Kb | 58   | 0.6 (HTZ)     | <i>FANCA</i> (NM_000135)                   | 30 Exons (1-30) | PATHOGENIC: 1 (1A, 2B, 2C, 3A, 4L, 4O)      | n/a                                             | AR, Compound HTZ with Pathogenic SNV (seemed HOM) | <i>FANCA</i> : c.82G>T, p.(Gly28*) | Fanconi anemia, complementation group A (227650)               |

GDD: Global Developmental Delay, ADHD: Attention deficit-hyperactivity disorder, DEL: Deletion, DUP: Duplication, b: base pair, Kb: Kilobase pair, Mb: Megabase pair, HOM: Homozygous, HTZ: Heterozygous, HEM: Hemizygous, aCGH: array-comparative genomic hybridization, MLPA: Multiplex Ligation dependent Probe Amplification, GAP-PCR: GAP-Polymerase Chain Reaction, STR: Short Tandem Repeats, SNV: Single Nucleotide Variant, AD: Autosomal Dominant, AR: Autosomal Recessive, XL: X-linked, n/a: not applicable.
