# Supplementary material for: Germline CNV Detection through Whole-Exome Sequencing (WES) Data Analysis Enhances Resolution of Rare Genetic Diseases
Source: MDPI journal article supplement (doi:10.3390/genes14071490), 2023-07-21
Supplement: s1 [file s1]

**Table S4.** Whole chromosomal duplications detected by ExomeDepth in two patients referred for WES.

| Patient | Karyotype | Disease                    | ExomeDepth predicted coordinates (Grch37/hg19) | CNV size | Reads Ratio |
|---------|-----------|----------------------------|------------------------------------------------|----------|-------------|
| 279     | 47,XX,+21 | Down syndrome (Trisomy 21) | DUPLICATION: chr21:10952913_48084286           | 37,1 Mb  | 1.31        |
| 35      | 47,XXY    | Klinefelter syndrome       | DUPLICATION: chrX:200855_155240074             | 155 Mb   | 1.8         |

Mb: Megabase pair
